# Supplementary material for: Polyethyleneimine-assisted formation of Ag–SiO2 hybrid microspheres for H2O2 sensing and SERS applications
Source: Royal Society of Chemistry journal article supplement (doi:10.1039/d3ra04095j), 2023-01-01
Supplement: d3ra04095j1.pdf [file d3ra04095j1.pdf]

## Supplementary Information

### **Polyethyleneimine Assisted Formation of Ag-SiO<sub>2</sub> Hybrid Microspheres for H<sub>2</sub>O<sub>2</sub> Sensing and SERS Applications**

Swati Mehta<sup>1,2</sup>, Jitendra Bahadur<sup>1,2\*</sup>, Debasis Sen<sup>1,2</sup>, Divya Nechiyl<sup>3</sup>, H. Bhatt<sup>4,2</sup>, Naveen Kumar<sup>5</sup>, Jyoti Prakash<sup>2,3</sup>

<sup>1</sup>Solid State Physics Division, Bhabha Atomic Research Centre, Mumbai, 400085, India

<sup>2</sup>Homi Bhabha National Institute, Mumbai, 400094, India

<sup>3</sup>Materials Group, Bhabha Atomic Research Centre, Mumbai, 400085, India

<sup>4</sup>High Pressure and Synchrotron Radiation Physics Division, Bhabha Atomic Research Centre, Mumbai, 400085, India

<sup>5</sup>Atomic and Molecular Physics Division, Bhabha Atomic Research Centre, Mumbai, 400085, India

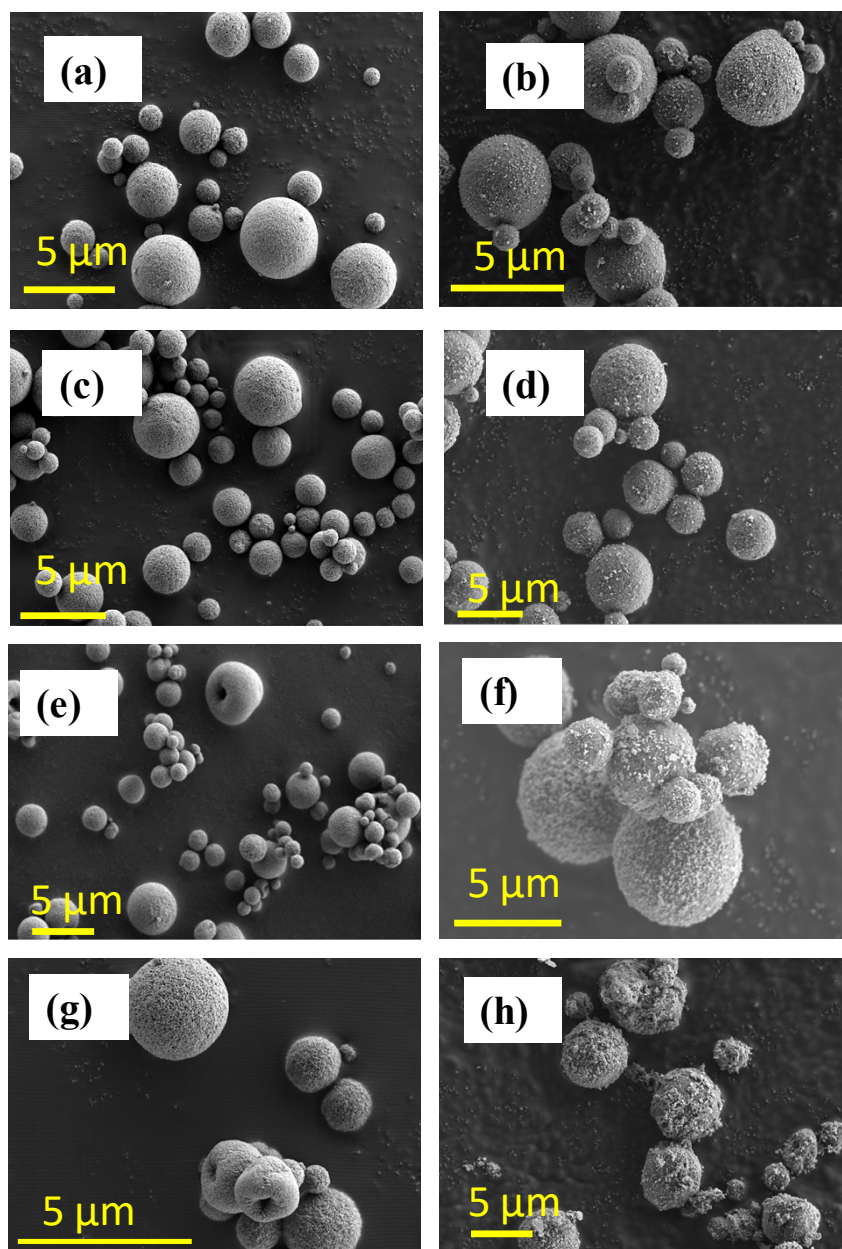

**Figure S1:** FESEM micrographs of silica-PEI microspheres and Ag-SiO<sub>2</sub> microspheres (a) Si-p5; (b) Si-p5-Ag (c) Si-p11; (d) Si-p11-Ag; (e) Si-p20; (f) Si-p20-Ag; (g) Si-p33; (h) Si-p33-Ag.

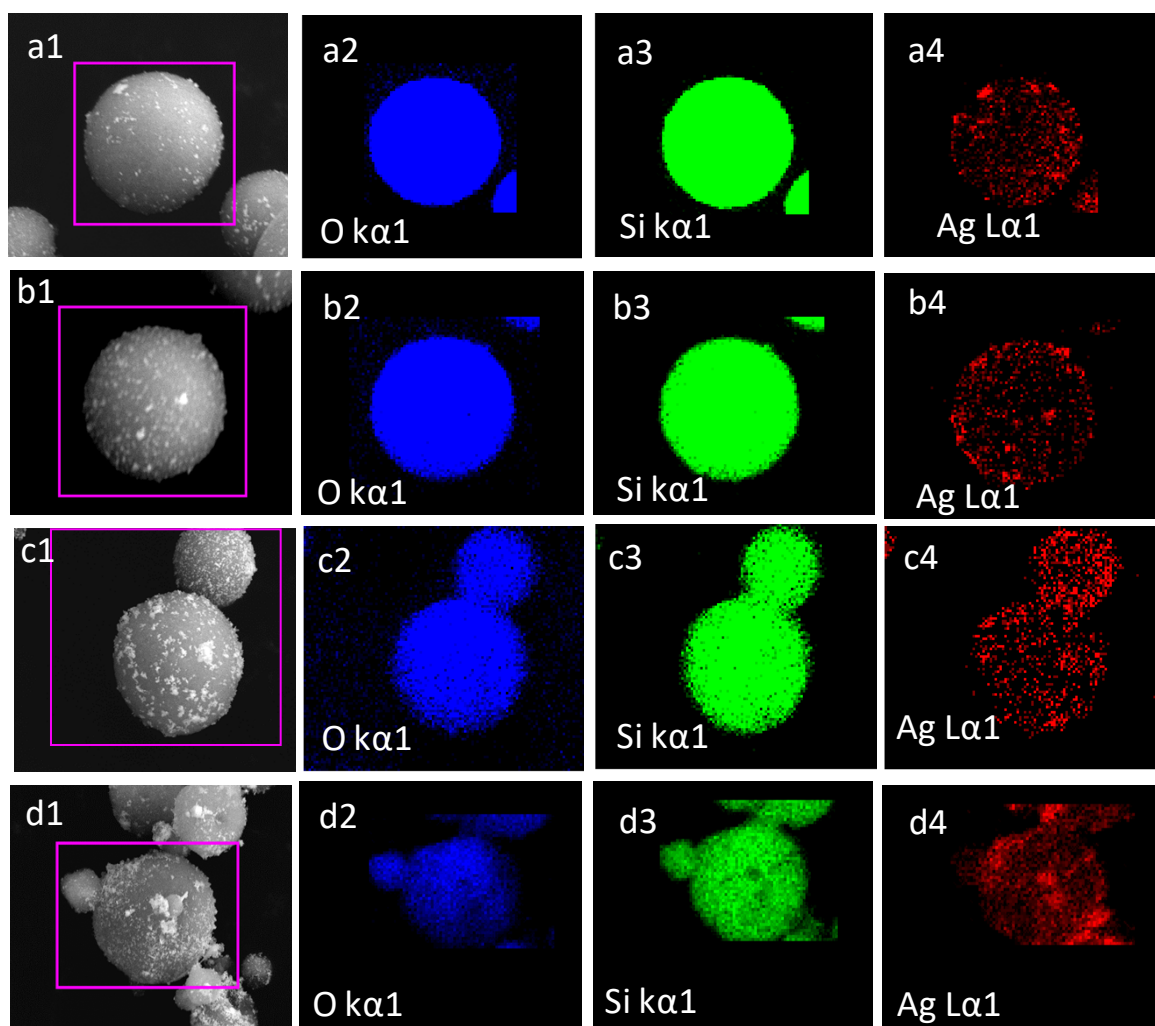

**Figure S2:** Energy Dispersive X-ray elemental mapping of Ag-SiO<sub>2</sub> microspheres obtained for (a) 5 wt% (b) 11 wt% (c) 20 wt% (d) 33 wt% PEI loading

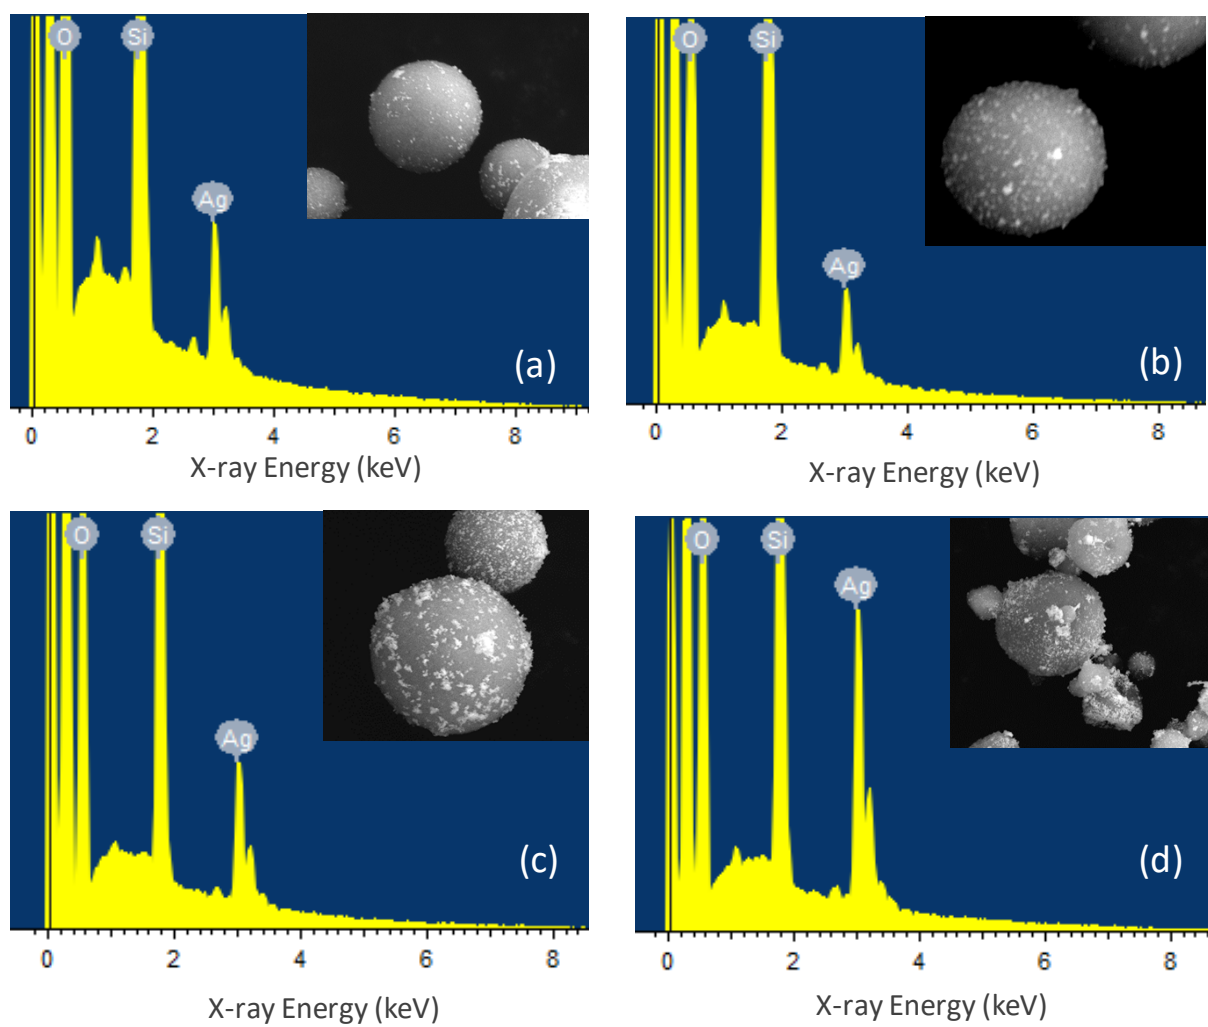

**Figure S3:** Energy Dispersive X-ray (EDX) spectra of Ag-SiO<sub>2</sub> microspheres obtained for (a) 5 wt% (b) 11 wt% (c) 20wt% (d) 33 wt% PEI loading

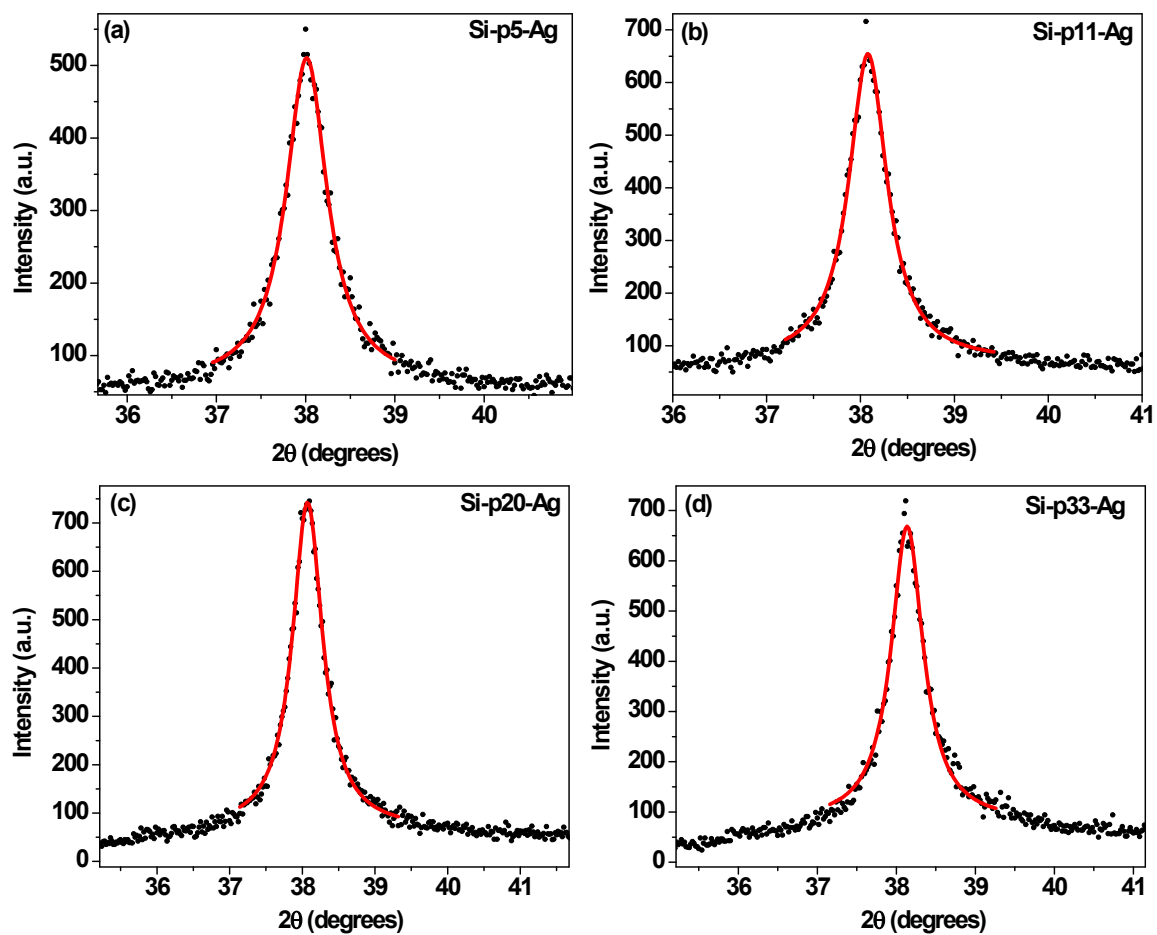

**Figure S4:** Lorentzian fit of the (111) peak of the XRD data for the Ag-SiO<sub>2</sub> microspheres.

**Figure S5:** UV-Visible spectrum of Ag-SiO<sub>2</sub> microspheres composite dispersed in water

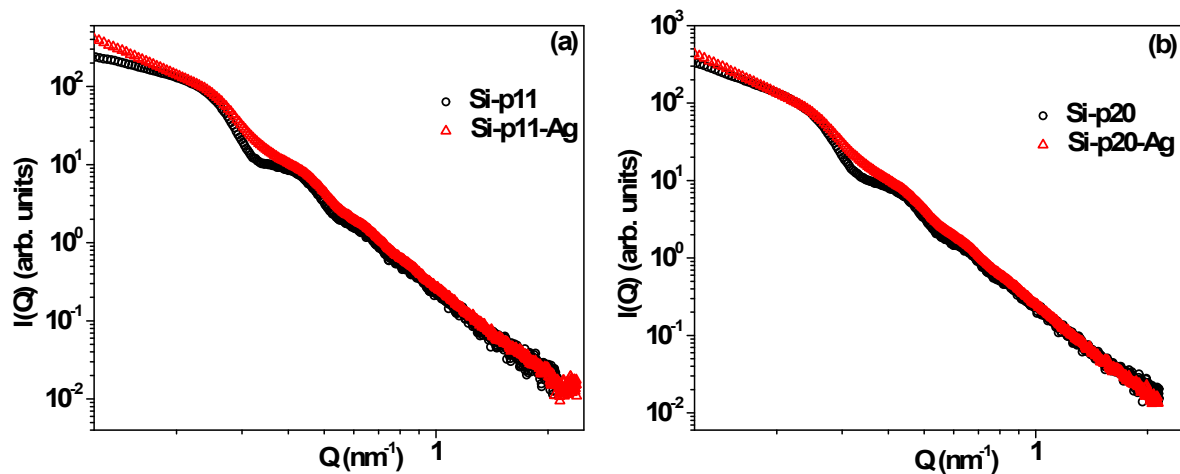

**Figure S6:** Comparison of SAXS profiles of silica-PEI and Ag-SiO<sub>2</sub> microspheres for (a) 11 wt% (b) 20 wt% PEI loading. Hollow circles (black) represent the SAXS data of pristine silica-PEI microspheres while profiles shown with hollow triangles (red) indicate SAXS data of Ag-SiO<sub>2</sub> microspheres.

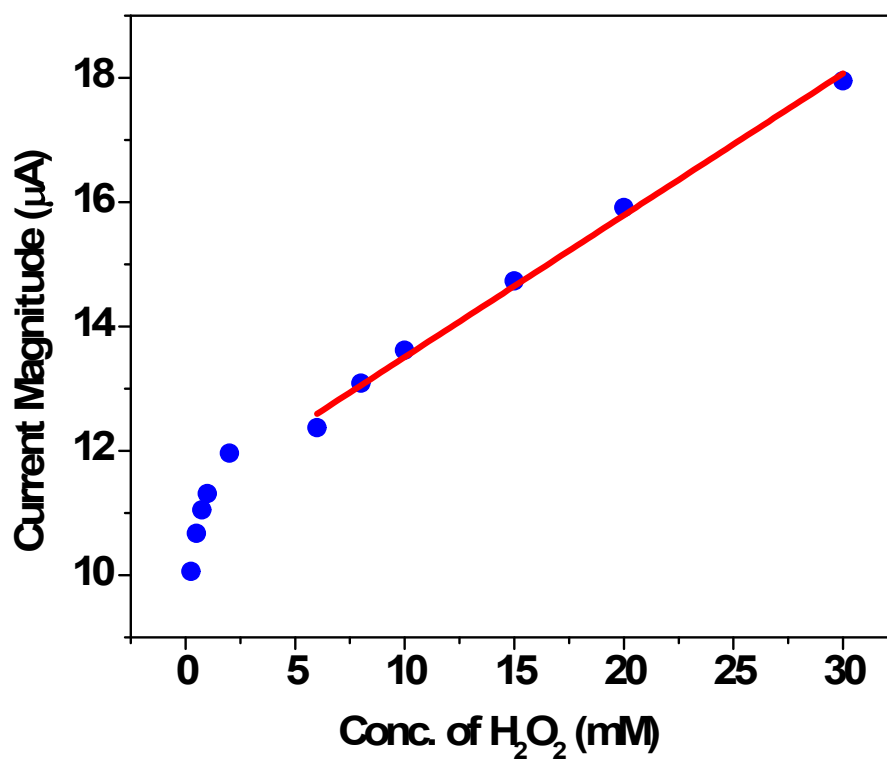

**Figure S7:** Variation in the magnitude of reduction current peak with  $H_2O_2$  concentration. Solid line represents the fitting of the linear range of the variation in current versus concentration of  $H_2O_2$ .

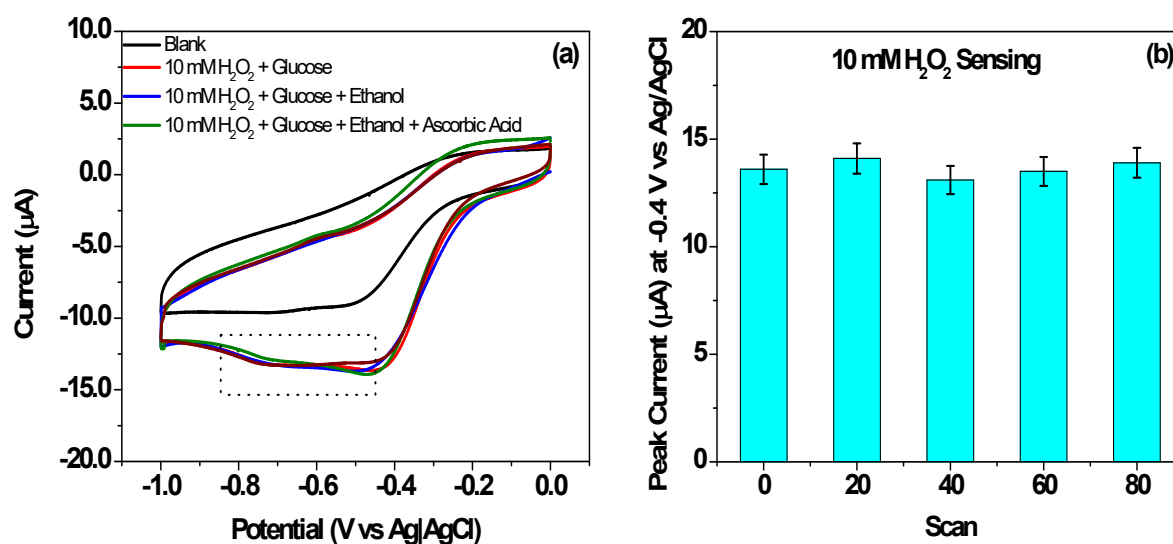

**Figure S8:** (a) CV measurements for the electrochemical detection of 10 mM  $H_2O_2$  in the presence of various interfering agents (glucose, ethanol, ascorbic acid). (b) Current corresponding to the reduction peak potential at -0.4 V vs Ag|AgCl with varying CV scans.

**Table S1:** Comparison of Ag nanoparticles-based sensor for electrochemical sensing of  $H_2O_2$

|                      | Reductant source                   | Analyte Detected | LOD         | Reference  |
|----------------------|------------------------------------|------------------|-------------|------------|
| Silver Nanoparticles | Polyethyleneimine                  | $H_2O_2$         | 1.08 mM     | This Study |
|                      | Lavender leaf extract              | $H_2O_2$         | -----       | 1          |
|                      | Dextrose                           | $H_2O_2$         | -----       | 2          |
|                      | Locust Bean Gum Polysaccharide     | $H_2O_2$         | -----       | 3          |
|                      | Starch                             | $H_2O_2$         | 0.9 $\mu M$ | 4          |
|                      | Euphorbia hirta (AEE) leaf extract | $H_2O_2$         | $10^{-7}$ M | 5          |

|  |                      |                               |          |   |
|--|----------------------|-------------------------------|----------|---|
|  | Agar & Ascorbic acid | H <sub>2</sub> O <sub>2</sub> | 0.03 μM  | 6 |
|  | Tea Extract          | H <sub>2</sub> O <sub>2</sub> | 0.73 μM  | 7 |
|  | Isoimperatorin       | H <sub>2</sub> O <sub>2</sub> | 0.036 μM | 8 |

**Figure S8:** *Schematic for the instrumentation of Raman scattering measurements carried out on Ag-SiO<sub>2</sub> microspheres.*



**Table S2:** Comparative study of the distinct support materials for Ag nanoparticles used as SERS substrates

| Support Material                   | Probe Molecule                     | LOD                   | Reference  |
|------------------------------------|------------------------------------|-----------------------|------------|
| Ag@SiO <sub>2</sub><br>Microsphere | Rhodamine 6G<br>(R6G)              | 10 <sup>-6</sup> M    | This study |
| Ag@ SiO <sub>2</sub>               | Prostate Specific<br>Antigen (PSA) | 0.11 pg/mL            | 9          |
| PDMS + lotus leaves                | Triazophos                         | 10 <sup>-8</sup> M    | 10         |
| Adhesive tape                      | Triazophos                         | 25 ng/cm <sup>2</sup> | 11         |
| Cotton Swabs                       | Thiabendazole                      | 1 ng/cm <sup>2</sup>  | 12         |
| PDMS                               | Thiram                             | 10 <sup>-5</sup> M    | 13         |
| PDMS+PS<br>microsphere             | Thiram                             | 10 <sup>-10</sup> M   | 14         |

### References:

1. B. Kumar, K. Smita and L. Cumbal, *Nanotechnology Reviews*, 2016, **5**, 521-528.
2. S. Mohan, O. S. Oluwafemi, S. C. George, V. Jayachandran, F. B. Lewu, S. P. Songca, N. Kalarikkal and S. Thomas, *Carbohydrate polymers*, 2014, **106**, 469-474.
3. C. K. Tagad, S. R. Dugasani, R. Aiyer, S. Park, A. Kulkarni and S. Sabharwal, *Sensors and Actuators B: Chemical*, 2013, **183**, 144-149.
4. P. Vasileva, B. Donkova, I. Karadjova and C. Dushkin, *Colloids and Surfaces A: Physicochemical and Engineering Aspects*, 2011, **382**, 203-210.
5. V. Kumar, R. K. Gundampati, D. K. Singh, D. Bano, M. V. Jagannadham and S. H. Hasan, *Journal of Photochemistry and Photobiology B: Biology*, 2016, **162**, 374-385.
6. S. Basiri, A. Mehdinia and A. Jabbari, *Colloids and Surfaces A: Physicochemical and Engineering Aspects*, 2018, **545**, 138-146.
7. P. Salazar, I. Fernandez, M. C. Rodríguez, A. Hernandez-Creus and J. L. González-Mora, *Journal of Electroanalytical Chemistry*, 2019, **855**, 113638.
8. M. Mavaei, A. Chahardoli, Y. Shokoohinia, A. Khoshroo and A. Fattahi, *Scientific reports*, 2020, **10**, 1762.
9. H. Chang, H. Kang, E. Ko, B.-H. Jun, H.-Y. Lee, Y.-S. Lee and D. H. Jeong, *Acs Sensors*, 2016, **1**, 645-649.
10. Z. Zhu, X. Shi, Y. Feng, M. He, C. Ye, H. Zhou, M. Zhang, W. Zhang, J. Li and C. Jiang, *Spectrochimica Acta Part A: Molecular and Biomolecular Spectroscopy*, 2023, **288**, 122211.
11. X. Gong, M. Tang, Z. Gong, Z. Qiu, D. Wang and M. Fan, *Food chemistry*, 2019, **295**, 254-258.

12. L. Kong, M. Huang, J. Chen and M. Lin, *New Journal of Chemistry*, 2020, **44**, 12779-12784.
13. A. Alyami, A. J. Quinn and D. Iacopino, *Talanta*, 2019, **201**, 58-64.
14. S. HaiYang, W. Zhengkun, Z. Yong and Z. Jie, *Optics Express*, 2023, **31**, 16484-16494.
